# Supplementary material for: CO2 electrochemical reduction boosted by the regulated electronic properties of metalloporphyrins through tuning an atomic environment
Source: Royal Society of Chemistry journal article supplement (doi:10.1039/d1nj01565f), 2021-01-01
Supplement: d1nj01565f1.pdf [file d1nj01565f1.pdf]

## **Electronic Supplementary Information for**

# **CO<sub>2</sub> electrochemical reduction boosted by the regulated electronic properties of metalloporphyrins through tuning atomic environment**

Jingjing Ye, Dewei Rao\* and Xiaohong Yan\*

School of Materials Science and Engineering, Jiangsu University, Zhenjiang 212013,

P. R. China. Fax: +86-511-88783268.

Email: dewei@ujs.edu.cn; yanxh@ujs.edu.cn

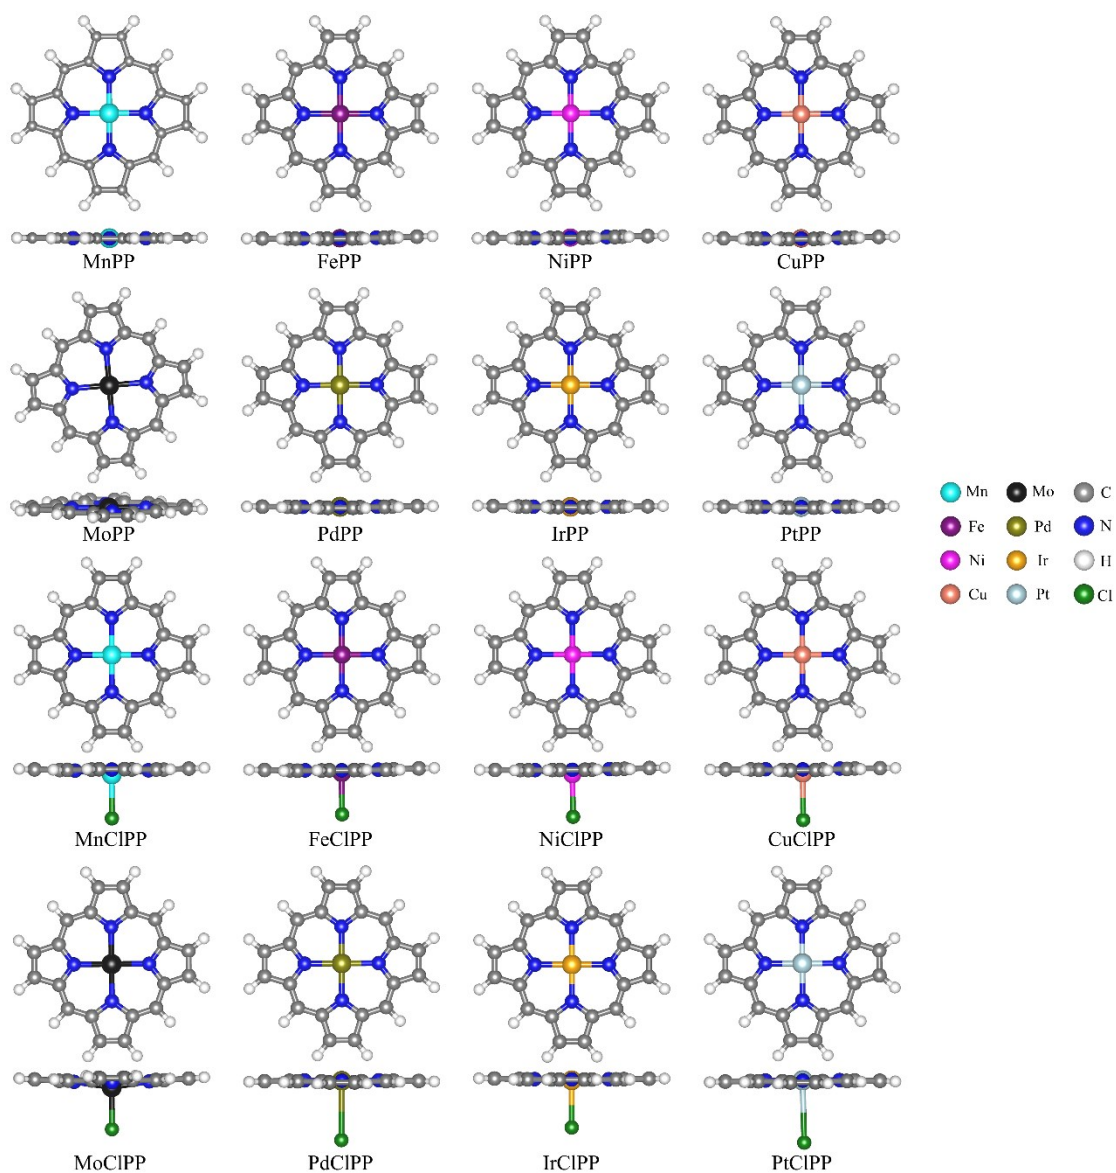

**Fig. S1** DFT-optimized structures of MPP and MCIPP, where M = Mn, Fe, Ni, Cu, Mo, Pd, Ir and Pt. The cyan, purple, fuchsia, pink, black, olive, orange, lightblue, grey, blue, white and green balls represent Mn, Fe, Ni, Cu, Mo, Pd, Ir, Pt, C, N, H and Cl atoms, respectively.

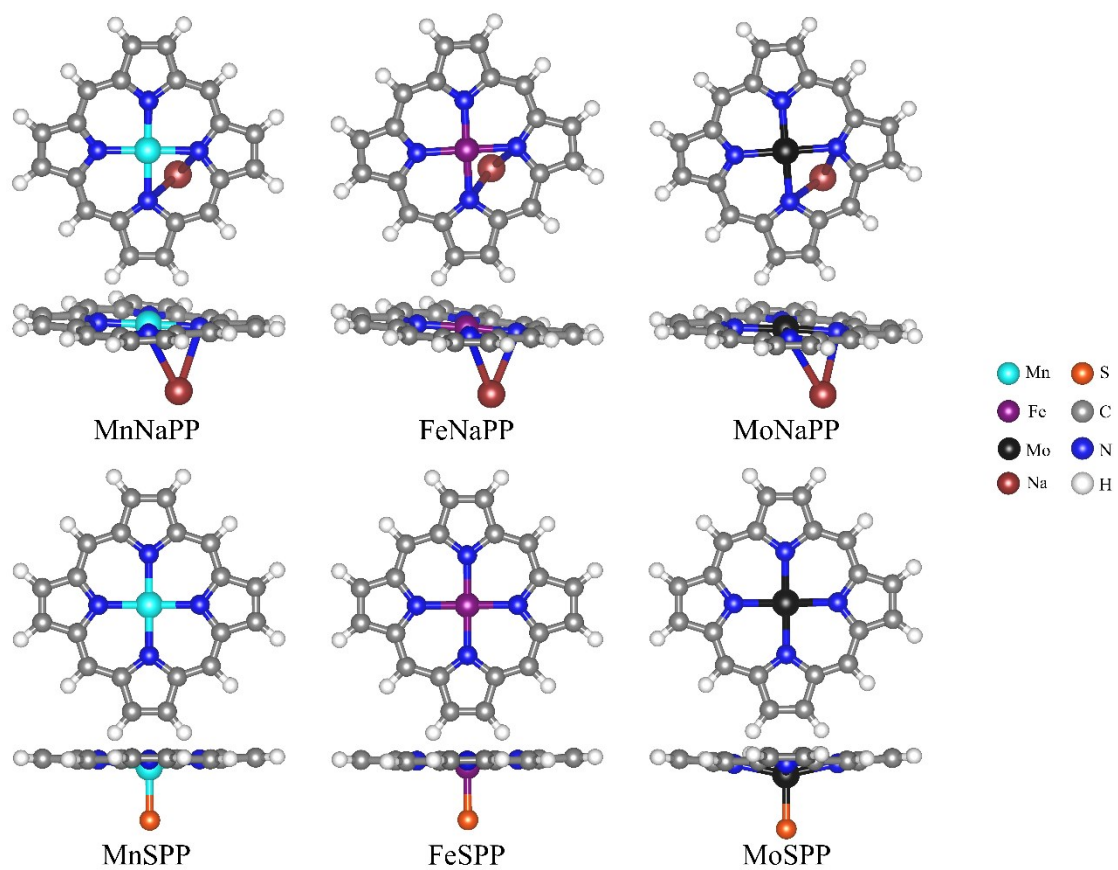

**Fig. S2** DFT-optimized structures of MXPP, where M = Mn, Fe, and Mo, X= Na and S. The cyan, purple, black, brown, orangered, grey, blue and white balls represent Mn, Fe, Mo, Na, S, C, N and H atoms, respectively.

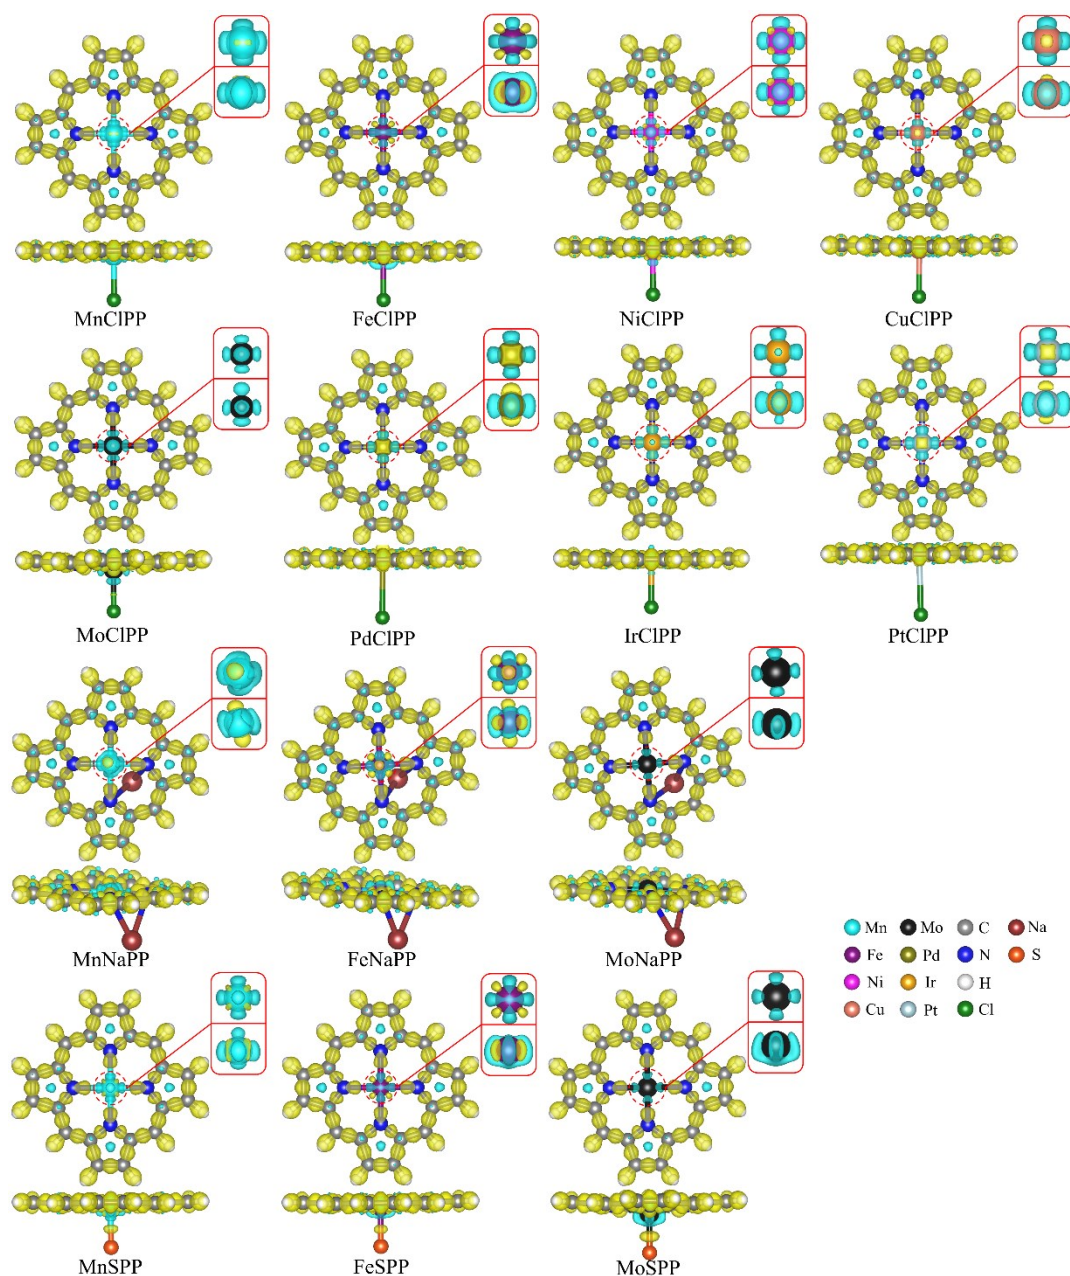

**Fig. S3** Top and side views of isosurface of deformation charge density of MPP and MCIPP, where M = Mn, Fe, Ni, Cu, Mo, Pd, Ir and Pt. The inset shows the top and side views of the enlarged deformation charge density of the metal sites. The value of isosurface is  $0.02 \text{ eV}/\text{\AA}^3$ . The cyan, purple, fuchsia, pink, black, olive, orange, lightblue, grey, blue, white and green balls represent Mn, Fe, Ni, Cu, Mo, Pd, Ir, Pt, C, N, H and Cl atoms, respectively.

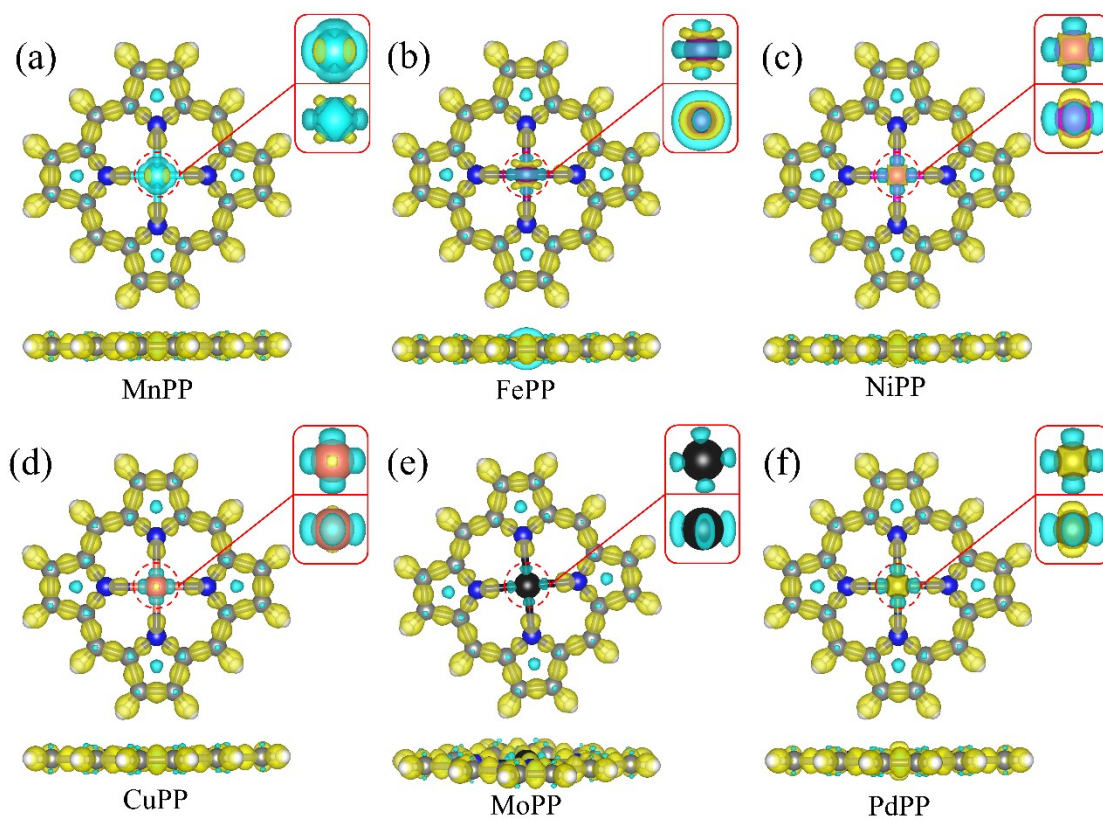

**Fig. S4** Top and side views of isosurface of deformation charge density of MNaPP and MSPP, where  $M = \text{Mn, Fe, and Mo}$ . The inset shows the top and side views of the enlarged deformation charge density of the metal sites. The yellow areas represent charge accumulation and the cyan areas represent charge depletion. The value of isosurface is  $0.02 \text{ eV}/\text{\AA}^3$ . The cyan, purple, black, brown, orange, grey, blue and white balls represent Mn, Fe, Mo, Na, S, C, N and H atoms, respectively.



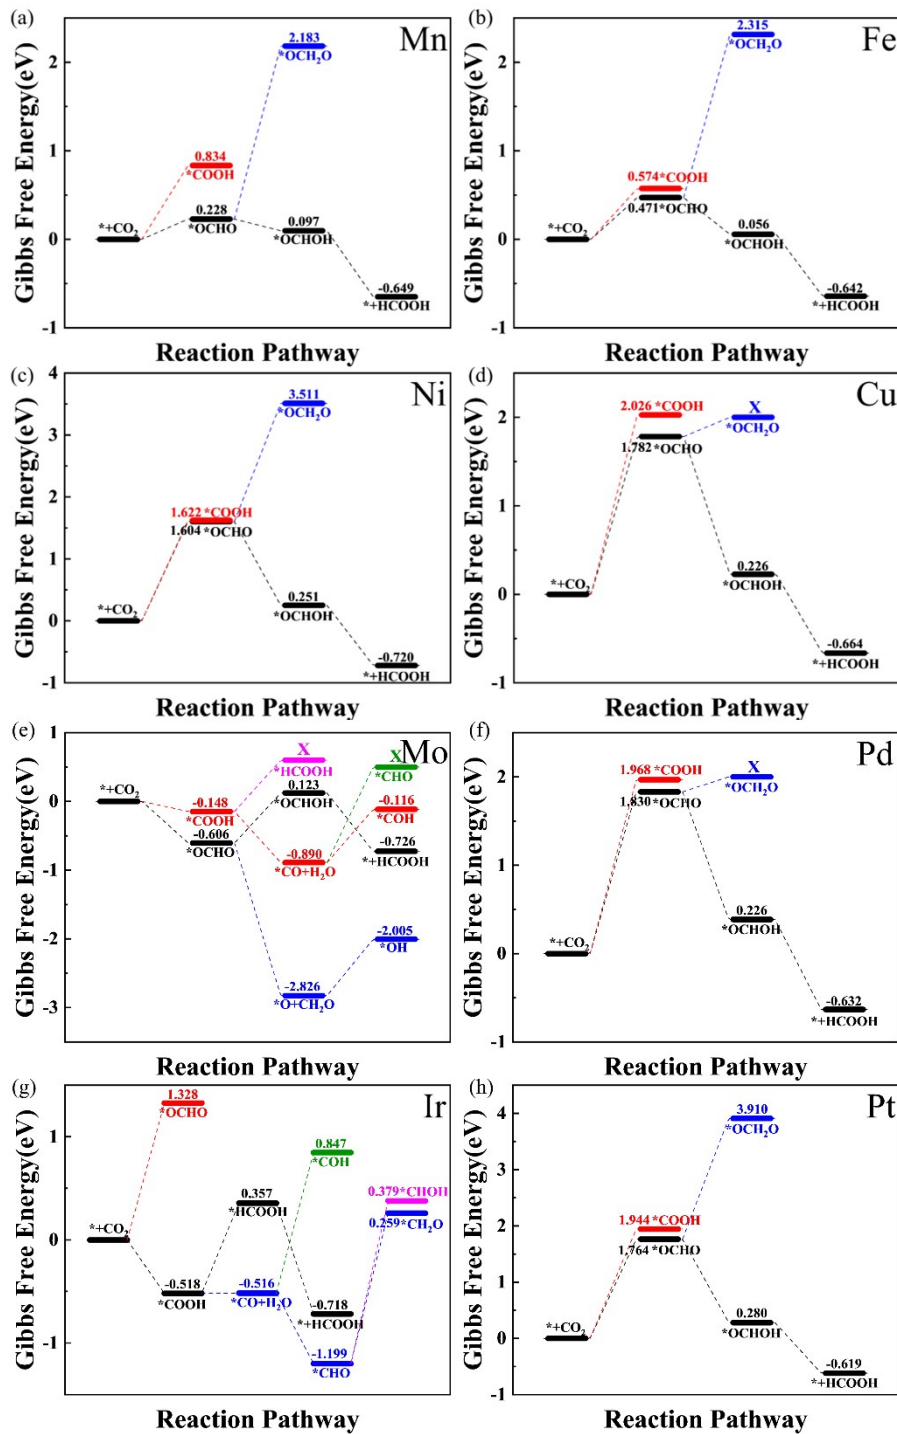

**Fig. S5** Gibbs free energy profiles for CO<sub>2</sub>RR on (a)MnPP, (b)FePP, (c)NiPP, (d)CuPP, (e)MoPP, (f)PdPP, (g)IrPP and (h)PtPP at zero potential. The free energy zero is set as that of a CO<sub>2</sub> molecule in the gas phase and with a clean catalyst surface. The "X" in the profiles indicates that the intermediate is unstable. The black line is the most favorable pathway.

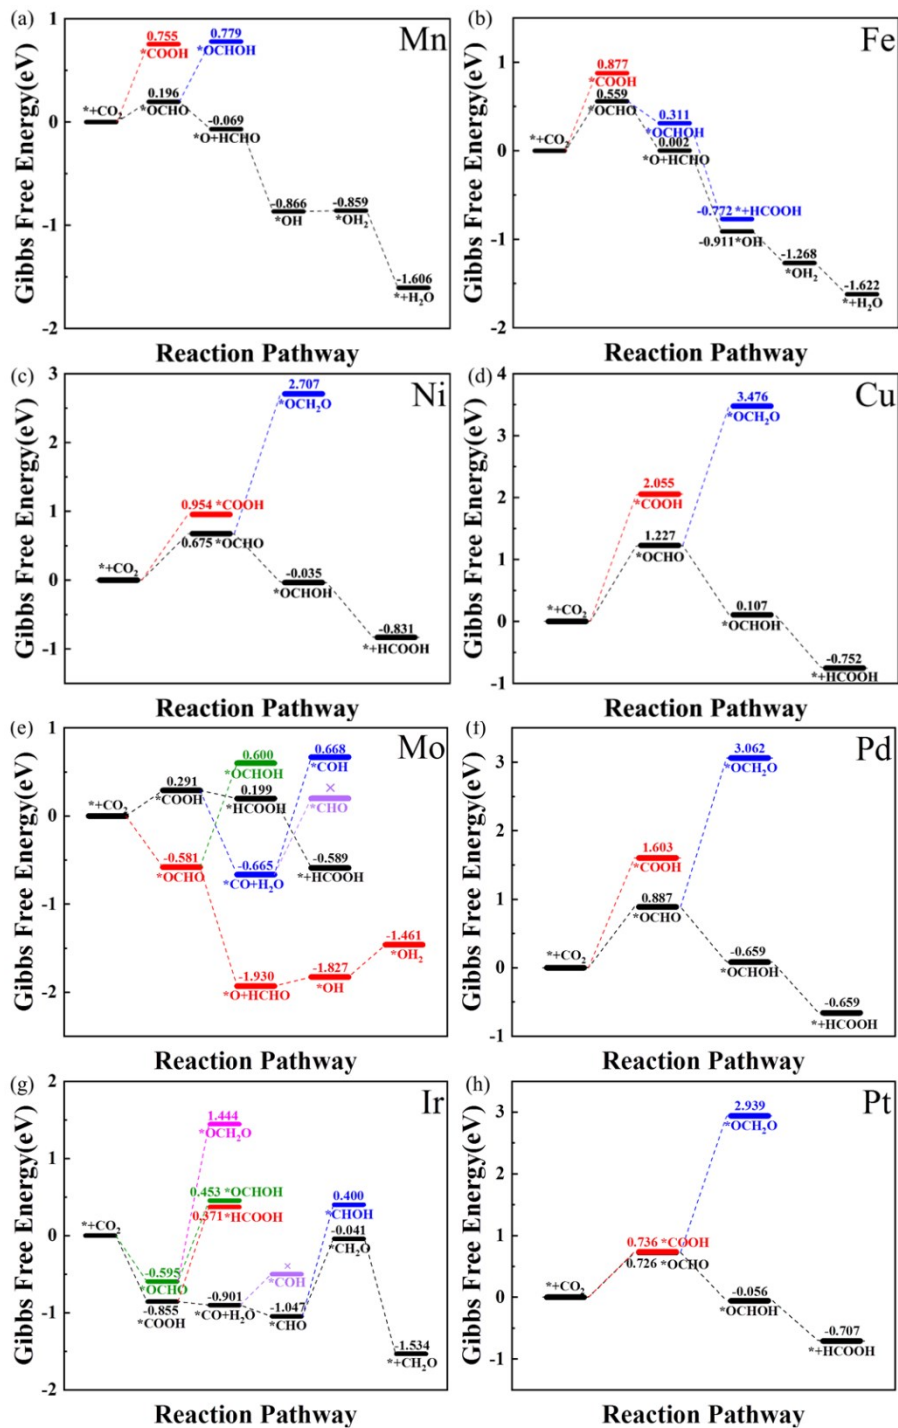

**Fig. S6** Gibbs free energy profiles for CO<sub>2</sub>RR on (a)MnCIPP, (b)FeCIPP, (c)NiCIPP, (d)CuCIPP, (e)MoCIPP, (f)PdCIPP, (g)IrCIPP and (h)PtCIPP at zero potential. The free energy zero is set as that of a CO<sub>2</sub> molecule in the gas phase and with a clean catalyst surface. The "X" in the profiles indicates that the intermediate is unstable. The black line is the most favorable pathway.

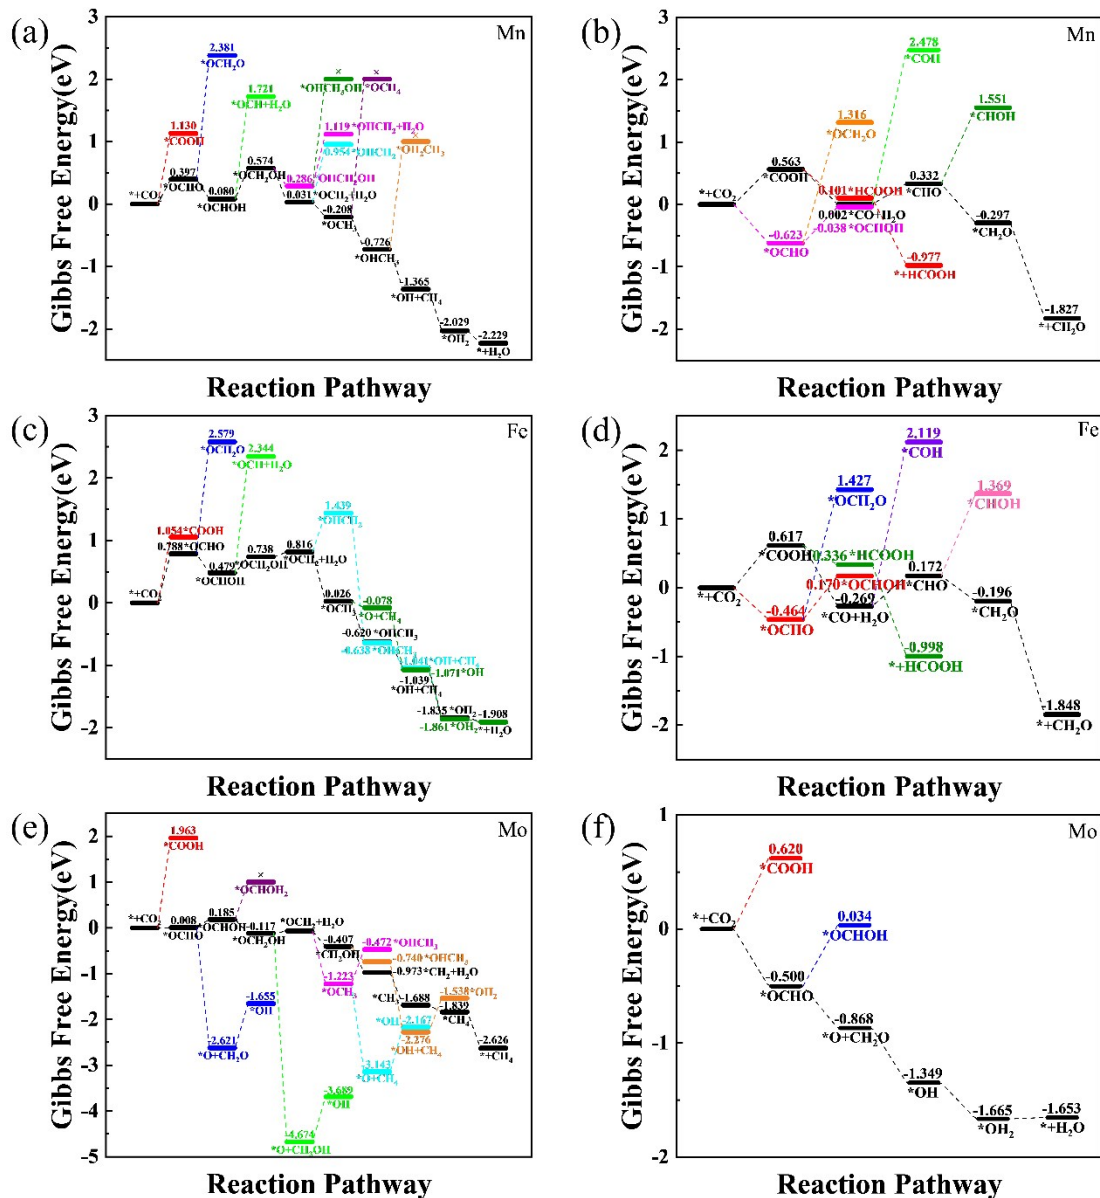

**Fig. S7** Gibbs free energy profiles for CO<sub>2</sub>RR on (a)MnNaPP, (b)MnSPP, (c)FeNaPP, (d)FeSPP, (e)MoNaPP and (f)MoSPP at zero potential. The free energy zero is set as that of a CO<sub>2</sub> molecule in the gas phase and with a clean catalyst surface. The "X" in the profiles indicates that the intermediate is unstable. The black line is the most favorable pathway.



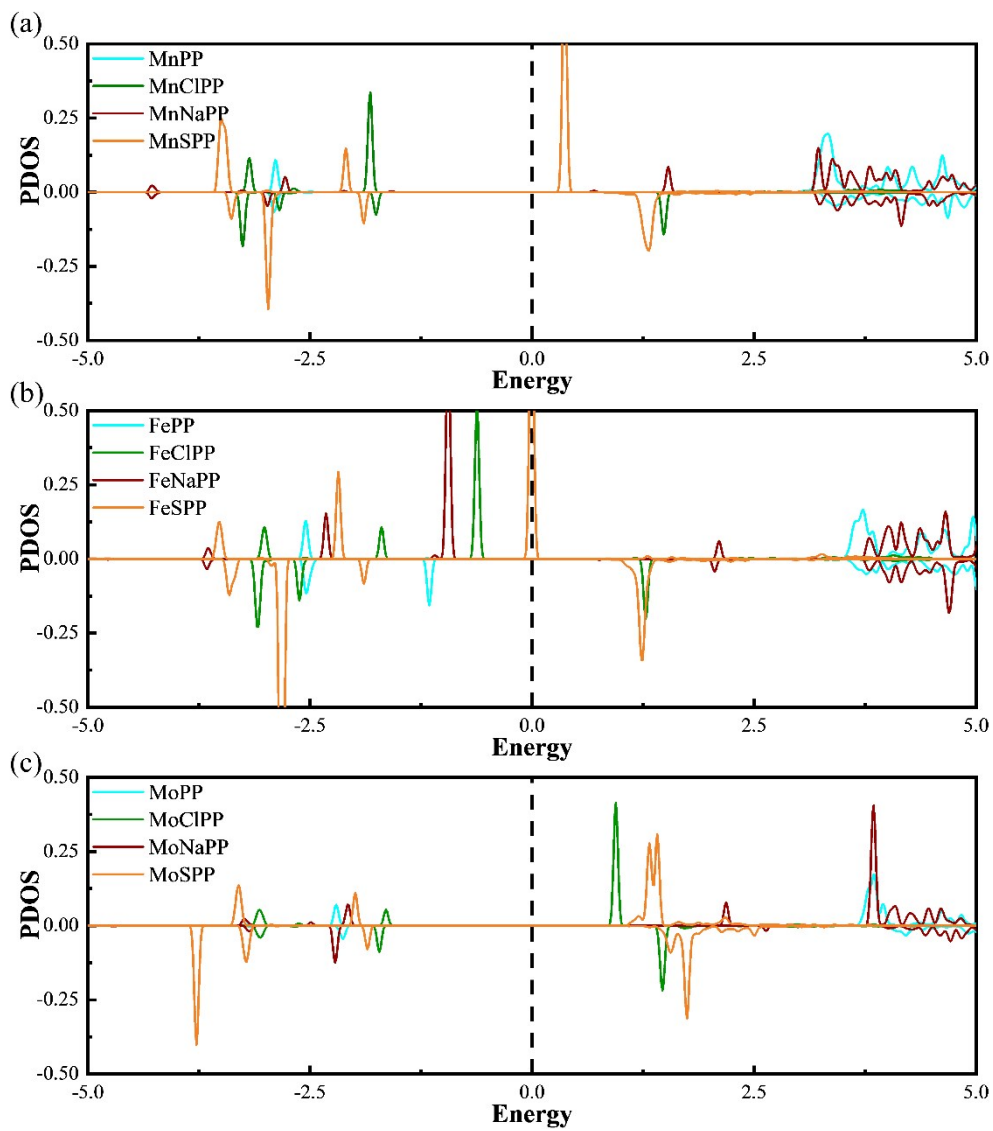

**Fig. S8** PDOS of (a) Mn, (b) Fe and (c) Mo atoms when doped with different ions.

**Table S1** Chemical potentials ( $\mu$ ) of gas-phase molecules obtained by summing up DFT electronic energy ( $E_{\text{DFT}}$ ), zero-point energy (ZPE), enthalpic temperature correction ( $\int C_p dT$ ), and entropy contribution ( $-TS$ ). <sup>a</sup> Data from Lim et al<sup>1</sup>. <sup>b</sup> Data from Peterson et al<sup>2</sup>. <sup>c</sup> Data from the current study. All data are given in eV.

| Species                 | $E_{\text{DFT}}^c$ | ZPE <sup>a</sup> (ZPE <sup>b</sup> ) | $\int C_p dT^b$ | $-TS^b$ | $\mu(\text{eV})$ |
|-------------------------|--------------------|--------------------------------------|-----------------|---------|------------------|
| CH <sub>4</sub>         | -24.04             | 1.19(1.20)                           | 0.10            | -0.60   | -23.34           |
| CO <sub>2</sub>         | -22.95             | 0.28(0.31)                           | 0.10            | -0.65   | -23.19           |
| CO                      | -14.78             | 0.12(0.14)                           | 0.09            | -0.67   | -15.22           |
| CH <sub>3</sub> OH      | -30.22             | (-1.35)                              | 0.11            | -0.79   | -32.25           |
| H <sub>2</sub>          | -6.77              | 0.3(0.27)                            | 0.09            | -0.42   | -6.83            |
| H <sub>2</sub> O        | -14.22             | 0.60(0.58)                           | 0.10            | -0.65   | -14.19           |
| HCOOH                   | -29.89             | 0.86(0.9)                            | 0.11            | -1.02   | -29.90           |
| CH <sub>2</sub> O(HCHO) | -22.13             | (-0.7)                               | 0.10            | -0.66   | -23.39           |

**Table S2** The electronic energy ( $E_{\text{DFT}}$ ), zero point energy (ZPE), and entropy contribution ( $-TS$ ) of adsorbate-surface systems on MPP, where M = Mn, Fe, Ni, Cu, Mo, Pd, Ir and Pt. The temperature of the reaction is 298.15 K. All data are given in eV.

| <b>Adsorbed species on MnPP</b> | <b><math>E_{\text{DFT}}</math></b> | <b>ZPE</b> | <b><math>-TS</math></b> |
|---------------------------------|------------------------------------|------------|-------------------------|
| *OCHO                           | -285.77841253                      | 0.5844     | -0.2000                 |
| *OCHOH                          | -289.59862081                      | 0.9265     | -0.2684                 |
| <b>Adsorbed species on FePP</b> | <b><math>E_{\text{DFT}}</math></b> | <b>ZPE</b> | <b><math>-TS</math></b> |
| *OCHO                           | -284.02311661                      | 0.5852     | -0.2567                 |
| *OCHOH                          | -288.16335322                      | 0.9220     | -0.2832                 |
| <b>Adsorbed species on NiPP</b> | <b><math>E_{\text{DFT}}</math></b> | <b>ZPE</b> | <b><math>-TS</math></b> |
| *OCHO                           | -280.26407046                      | 0.5616     | -0.2072                 |
| *OCHOH                          | -285.32408735                      | 0.9067     | -0.2598                 |
| <b>Adsorbed species on CuPP</b> | <b><math>E_{\text{DFT}}</math></b> | <b>ZPE</b> | <b><math>-TS</math></b> |
| *OCHO                           | -277.80343014                      | 0.5578     | -0.2009                 |
| *OCHOH                          | -283.06709841                      | 0.9098     | -0.2605                 |
| <b>Adsorbed species on MoPP</b> | <b><math>E_{\text{DFT}}</math></b> | <b>ZPE</b> | <b><math>-TS</math></b> |
| *OCHO                           | -286.87843094                      | 0.5942     | -0.2585                 |
| *OCHOH                          | -289.91263921                      | 0.9213     | -0.2369                 |
| <b>Adsorbed species on PdPP</b> | <b><math>E_{\text{DFT}}</math></b> | <b>ZPE</b> | <b><math>-TS</math></b> |
| *OCHO                           | -279.95376489                      | 0.5545     | -0.2150                 |
| *OCHOH                          | -285.19776296                      | 0.8933     | -0.1683                 |
| <b>Adsorbed species on IrPP</b> | <b><math>E_{\text{DFT}}</math></b> | <b>ZPE</b> | <b><math>-TS</math></b> |
| *COOH                           | -284.95473398                      | 0.6318     | -0.1562                 |
| *HCOOH                          | -287.69480262                      | 0.9010     | -0.2258                 |
| <b>Adsorbed species on PtPP</b> | <b><math>E_{\text{DFT}}</math></b> | <b>ZPE</b> | <b><math>-TS</math></b> |
| *OCHO                           | -281.38644511                      | 0.5612     | -0.2772                 |
| *OCHOH                          | -286.66923170                      | 0.8860     | -0.2176                 |

**Table S3** The electronic energy ( $E_{\text{DFT}}$ ), zero point energy (ZPE), and entropy contribution ( $-TS$ ) of adsorbate-surface systems on MCIPP, where M = Mn, Fe, Ni, Cu, Mo, Pd, Ir and Pt. All data are given in eV.

| <b>Adsorbed species on MnCIPP</b> | <b><math>E_{\text{DFT}}</math></b> | <b>ZPE</b>        | <b><math>-TS</math></b> |
|-----------------------------------|------------------------------------|-------------------|-------------------------|
| *OCHO                             | -291.32625654                      | 0.5629            | -0.2384                 |
| *O+CH <sub>2</sub> O              | -271.30319921                      | 0.0690            | -0.0568                 |
| *OH                               | -275.75684294                      | 0.3550            | -0.1013                 |
| *OH <sub>2</sub>                  | -279.41878353                      | 0.6600            | -0.1526                 |
| <b>Adsorbed species on FeCIPP</b> | <b><math>E_{\text{DFT}}</math></b> | <b>ZPE</b>        | <b><math>-TS</math></b> |
| *OCHO                             | -289.47395911                      | 0.6025            | -0.2213                 |
| *O+CH <sub>2</sub> O/<br>*OCHOH   | -269.69461495/<br>-293.51022311    | 0.0726/<br>0.9494 | -0.0528/<br>-0.1956     |
| *OH                               | -274.24855348                      | 0.3476            | -0.1021                 |
| *OH <sub>2</sub>                  | -278.30053476                      | 0.6649            | -0.1397                 |
| <b>Adsorbed species on NiCIPP</b> | <b><math>E_{\text{DFT}}</math></b> | <b>ZPE</b>        | <b><math>-TS</math></b> |
| *OCHO                             | -285.82529599                      | 0.5734            | -0.2589                 |
| *OCHOH                            | -290.21958811                      | 0.8991            | -0.3154                 |
| <b>Adsorbed species on CuCIPP</b> | <b><math>E_{\text{DFT}}</math></b> | <b>ZPE</b>        | <b><math>-TS</math></b> |
| *OCHO                             | -283.15555263                      | 0.5629            | -0.2700                 |
| *OCHOH                            | -288.03665625                      | 0.8983            | -0.2595                 |
| <b>Adsorbed species on MoCIPP</b> | <b><math>E_{\text{DFT}}</math></b> | <b>ZPE</b>        | <b><math>-TS</math></b> |
| *COOH                             | -292.36700416                      | 0.6012            | -0.1833                 |
| *HCOOH                            | -296.11854325                      | 0.9091            | -0.2471                 |
| <b>Adsorbed species on PdCIPP</b> | <b><math>E_{\text{DFT}}</math></b> | <b>ZPE</b>        | <b><math>-TS</math></b> |
| *OCHO                             | -285.44500083                      | 0.5571            | -0.2366                 |
| *OCHOH                            | -289.89936175                      | 0.8794            | -0.3248                 |
| <b>Adsorbed species on IrCIPP</b> | <b><math>E_{\text{DFT}}</math></b> | <b>ZPE</b>        | <b><math>-TS</math></b> |
| *COOH                             | -290.90362127                      | 0.6230            | -0.2156                 |
| *CO+H <sub>2</sub> O              | -279.87689838                      | 0.2332            | -0.1232                 |
| *CHO                              | -283.71194057                      | 0.4795            | -0.0951                 |
| *CH <sub>2</sub> O                | -286.24227416                      | 0.7367            | -0.2316                 |
| <b>Adsorbed species on PtCIPP</b> | <b><math>E_{\text{DFT}}</math></b> | <b>ZPE</b>        | <b><math>-TS</math></b> |

|        |               |        |         |
|--------|---------------|--------|---------|
| *OCHO  | -286.87146368 | 0.5684 | -0.2655 |
| *OCHOH | -291.37161234 | 0.8585 | -0.2528 |

**Table S4** The electronic energy ( $E_{\text{DFT}}$ ), zero point energy (ZPE), and entropy contribution ( $-TS$ ) of adsorbate-surface systems on MXPP, where M = Mn, Fe, and Mo, X= Na and S. All data are given in eV.

| Adsorbed species on MnNaPP          | $E_{\text{DFT}}$ | ZPE     | $-TS$    |
|-------------------------------------|------------------|---------|----------|
| *OCHO                               | -283.88984085    | 0.5671  | -0.1760  |
| *OCHOH                              | -287.92208430    | 0.9223  | -0.2309  |
| *OCH <sub>2</sub> OH                | -291.06093975    | 1.2094  | -0.2997  |
| *OCH <sub>2</sub> +H <sub>2</sub> O | -280.44891277    | 0.7560  | -0.2265  |
| *OCH <sub>3</sub>                   | -284.48901794    | 1.0589  | -0.1436  |
| *OHCH <sub>3</sub>                  | -288.68945759    | 1.4078  | -0.2252  |
| *OH+CH <sub>4</sub>                 | -268.42933007    | 0.3331  | -0.1245  |
| *OH <sub>2</sub>                    | -272.74338160    | 0.6273  | -0.1838  |
| Adsorbed species on FeNaPP          | $E_{\text{DFT}}$ | ZPE     | $-TS$    |
| *OCHO                               | -282.19167177    | 0.5866  | -0.2072  |
| *OCHOH                              | -286.21364147    | 0.9360  | -0.2583  |
| *OCH <sub>2</sub> OH                | -289.59387388    | 1.2130  | -0.3108  |
| *OCH <sub>2</sub> +H <sub>2</sub> O | -278.38997146    | 0.7411  | -0.1903  |
| *OCH <sub>3</sub> /                 | -282.91449711/   | 1.0658/ | -0.1951/ |
| *OHCH <sub>2</sub>                  | -281.36904487    | 1.0244  | -0.2865  |
| *OHCH <sub>3</sub> /                | -287.27666562/   | 1.4076/ | -0.2359/ |
| *O+CH <sub>4</sub>                  | -262.22797157    | 0.0708  | -0.0655  |
| *OH+CH <sub>4</sub> /               | -266.79131062/   | 0.3229/ | -0.1309/ |
| *OH                                 | -266.80629702/   | 0.3193  | -0.1441  |
| *OH <sub>2</sub>                    | -271.23867018/   | 0.6373/ | -0.2086/ |
|                                     | -271.27248648    | 0.6408  | -0.2040  |
| Adsorbed species on MoNaPP          | $E_{\text{DFT}}$ | ZPE     | $-TS$    |
| *OCHO                               | -284.54706632    | 0.5935  | -0.2561  |
| *OCHOH                              | -288.13830475    | 0.9322  | -0.2419  |



|                                     |                                 |                   |                     |
|-------------------------------------|---------------------------------|-------------------|---------------------|
| *OCH <sub>2</sub> OH                | -292.20610086                   | 1.2364            | -0.1954             |
| *OCH <sub>2</sub> +H <sub>2</sub> O | -280.92708700                   | 0.7510            | -0.1645             |
| *CH <sub>2</sub> OH                 | -284.95984391                   | 1.0840            | -0.2193             |
| *CH <sub>2</sub> +H <sub>2</sub> O  | -274.35528727                   | 0.5956            | -0.1265             |
| *CH <sub>3</sub>                    | -278.81717133                   | 0.9190            | -0.1181             |
| *CH <sub>4</sub>                    | -282.59337561                   | 1.2017            | -0.1905             |
| <b>Adsorbed species on MnSPP</b>    | <b>E<sub>DFT</sub></b>          | <b>ZPE</b>        | <b>-TS</b>          |
| *COOH                               | -292.20720968                   | 0.6130            | -0.1747             |
| *CO+H <sub>2</sub> O/<br>*HCOOH     | -281.61095461/<br>-296.30127078 | 0.1984/<br>0.8979 | -0.1418/<br>-0.2419 |
| *CHO                                | -284.90417098                   | 0.4402            | -0.1757             |
| *CH <sub>2</sub> O                  | -289.08759458                   | 0.7178            | -0.3134             |
| <b>Adsorbed species on FeSPP</b>    | <b>E<sub>DFT</sub></b>          | <b>ZPE</b>        | <b>-TS</b>          |
| *COOH                               | -290.68597416                   | 0.6152            | -0.1856             |
| *CO+H <sub>2</sub> O/<br>*HCOOH     | -280.44180630/<br>-294.68130917 | 0.2115/<br>0.8992 | -0.1375/<br>-0.1704 |
| *CHO                                | -283.63400729                   | 0.4528            | -0.1602             |
| *CH <sub>2</sub> O                  | -287.61056082                   | 0.7358            | -0.2504             |
| <b>Adsorbed species on MoSPP</b>    | <b>E<sub>DFT</sub></b>          | <b>ZPE</b>        | <b>-TS</b>          |
| *OCHO                               | -295.42469752                   | 0.5621            | -0.2224             |
| *O+CH <sub>2</sub> O                | -275.48105776                   | 0.0663            | -0.0632             |
| *OH                                 | -279.58353434                   | 0.3287            | -0.1190             |
| *OH <sub>2</sub>                    | -283.51458385                   | 0.6281            | -0.2186             |

**Table S5** The energy of the catalyst to adsorb HCOOH, CO, CH<sub>2</sub>O, CH<sub>3</sub>OH and CH<sub>4</sub> on MPP, where M = Mn, Fe, Ni, Cu, Mo, Pd, Ir and Pt. All data are given in eV.

| Catalyst  | HCOOH  | CO     | CH <sub>2</sub> O |
|-----------|--------|--------|-------------------|
| <b>Mn</b> | -0.552 | /      | /                 |
| <b>Fe</b> | -0.494 | /      | /                 |
| <b>Ni</b> | -0.293 | /      | /                 |
| <b>Cu</b> | -0.343 | /      | /                 |
| <b>Mo</b> | -0.664 | -3.386 | -0.232            |
| <b>Pd</b> | -0.260 | /      | /                 |
| <b>Ir</b> | -0.618 | -1.457 | -0.503            |
| <b>Pt</b> | -0.334 | /      | /                 |

**Table S6** Equilibrium potentials of several possible CO<sub>2</sub>RR cathode reactions<sup>3</sup>.

| Reactions                                                                                 | U <sub>equ</sub> vs RHE(V) |
|-------------------------------------------------------------------------------------------|----------------------------|
| CO <sub>2</sub> +2H <sup>+</sup> +2e <sup>-</sup> →CO(g)+H <sub>2</sub> O                 | -0.12                      |
| CO <sub>2</sub> +2H <sup>+</sup> +2e <sup>-</sup> →HCOOH(l)                               | -0.20                      |
| CO <sub>2</sub> +4H <sup>+</sup> +4e <sup>-</sup> →HCHO(l)+H <sub>2</sub> O               | -0.07                      |
| CO <sub>2</sub> +6H <sup>+</sup> +6e <sup>-</sup> →CH <sub>3</sub> OH(l)+H <sub>2</sub> O | 0.03                       |
| CO <sub>2</sub> +8H <sup>+</sup> +8e <sup>-</sup> →CH <sub>4</sub> (g)+2H <sub>2</sub> O  | 0.17                       |

**Table S7** The potential determining steps (PDS), maximum free energy change ( $\Delta G_{\max}$ /eV), reduction products and overpotentials ( $\eta$ /V) of the CO<sub>2</sub>RR on MPP, where M = Mn, Fe, Ni, Cu, Mo, Pd, Ir and Pt.

| Catalyst  | PDS                     | $\Delta G_{\max}$ (eV) | Product | $\eta$ (V) |
|-----------|-------------------------|------------------------|---------|------------|
| <b>Mn</b> | *CO <sub>2</sub> →*OCHO | 0.228                  | HCOOH   | 0.028      |
| <b>Fe</b> | *CO <sub>2</sub> →*OCHO | 0.471                  | HCOOH   | 0.271      |
| <b>Ni</b> | *CO <sub>2</sub> →*OCHO | 1.604                  | HCOOH   | 1.404      |
| <b>Cu</b> | *CO <sub>2</sub> →*OCHO | 1.782                  | HCOOH   | 1.582      |
| <b>Mo</b> | *OCHO→*OCHOH            | 0.729                  | HCOOH   | 0.529      |
| <b>Pd</b> | *CO <sub>2</sub> →*OCHO | 1.830                  | HCOOH   | 1.630      |
| <b>Ir</b> | *COOH→*HCOOH            | 0.875                  | HCOOH   | 0.675      |
| <b>Pt</b> | *CO <sub>2</sub> →*OCHO | 1.764                  | HCOOH   | 1.564      |

**Table S8** The potential determining steps (PDS), maximum free energy change ( $\Delta G_{\max}/\text{eV}$ ), reduction products and overpotentials ( $\eta/\text{V}$ ) of the  $\text{CO}_2\text{RR}$  on MCIPP, where M = Mn, Fe, Ni, Cu, Mo, Pd, Ir and Pt.

| Catalyst  | PDS                                             | $\Delta G_{\max}$ (eV) | Product    | $\eta$ (V)  |
|-----------|-------------------------------------------------|------------------------|------------|-------------|
| <b>Mn</b> | * $\text{CO}_2 \rightarrow \text{*OCHO}$        | 0.196                  | HCHO       | 0.126       |
| <b>Fe</b> | * $\text{CO}_2 \rightarrow \text{*OCHO}$        | 0.559                  | HCHO/HCOOH | 0.489/0.359 |
| <b>Ni</b> | * $\text{CO}_2 \rightarrow \text{*OCHO}$        | 0.675                  | HCOOH      | 0.475       |
| <b>Cu</b> | * $\text{CO}_2 \rightarrow \text{*OCHO}$        | 1.227                  | HCOOH      | 1.027       |
| <b>Mo</b> | * $\text{CO}_2 \rightarrow \text{*COOH}$        | 0.291                  | HCOOH      | 0.091       |
| <b>Pd</b> | * $\text{CO}_2 \rightarrow \text{*OCHO}$        | 0.887                  | HCOOH      | 0.687       |
| <b>Ir</b> | * $\text{CHO} \rightarrow \text{*CH}_2\text{O}$ | 1.005                  | HCHO       | 0.935       |
| <b>Pt</b> | * $\text{CO}_2 \rightarrow \text{*OCHO}$        | 0.726                  | HCOOH      | 0.526       |

**Table S9** The potential determining steps (PDS), maximum free energy change ( $\Delta G_{\max}/\text{eV}$ ), reduction products and overpotentials ( $\eta/\text{V}$ ) of the  $\text{CO}_2\text{RR}$  on MXPP, where M = Mn, Fe, and Mo, X= Na and S.

| Catalyst                   | PDS                                                 | $\Delta G_{\max}$ (eV) | Product       | $\eta$ (V)  |
|----------------------------|-----------------------------------------------------|------------------------|---------------|-------------|
| <b>Mn (Na<sup>+</sup>)</b> | * $\text{OCHOH} \rightarrow \text{*OCH}_2\text{OH}$ | 0.494                  | $\text{CH}_4$ | 0.663       |
| <b>Mn (S<sup>2-</sup>)</b> | * $\text{CO}_2 \rightarrow \text{*COOH}$            | 0.563                  | HCHO/HCOOH    | 0.493/0.313 |
| <b>Fe (Na<sup>+</sup>)</b> | * $\text{CO}_2 \rightarrow \text{*OCHO}$            | 0.788                  | $\text{CH}_4$ | 0.957       |
| <b>Fe (S<sup>2-</sup>)</b> | * $\text{CO}_2 \rightarrow \text{*COOH}$            | 0.617                  | HCHO/HCOOH    | 0.547/0.367 |
| <b>Mo (Na<sup>+</sup>)</b> | * $\text{OCHO} \rightarrow \text{*OCHOH}$           | 0.177                  | $\text{CH}_4$ | 0.346       |
| <b>Mo (S<sup>2-</sup>)</b> | * $\text{OH}_2 \rightarrow \text{*+H}_2\text{O}$    | 0.012                  | HCHO          | -0.060      |

## References

1. D. H. Lim, J. H. Jo, D. Y. Shin, J. Wilcox, H. C. Ham and S. W. Nam, *Nanoscale*, 2014, **6**, 5087-5092.
2. A. A. Peterson, F. Abild-Pedersen, F. Studt, J. R. Osmiumsl and J. K. Nerskov, *Energ. Environ. Sci.*, 2010, **3**, 1311-1315.
3. C. Oloman and H. Li, *ChemSusChem*, 2008, **1**, 385-391.
